# Supplementary material
Source: publisher site journal article supplement (https://kjim.org/upload/media/kjim-2023-311-Supplementary-Fig-3.pdf)
Supplement: Supplementary file 1 [file kjim-2023-311-Supplementary-Fig-3.pdf]

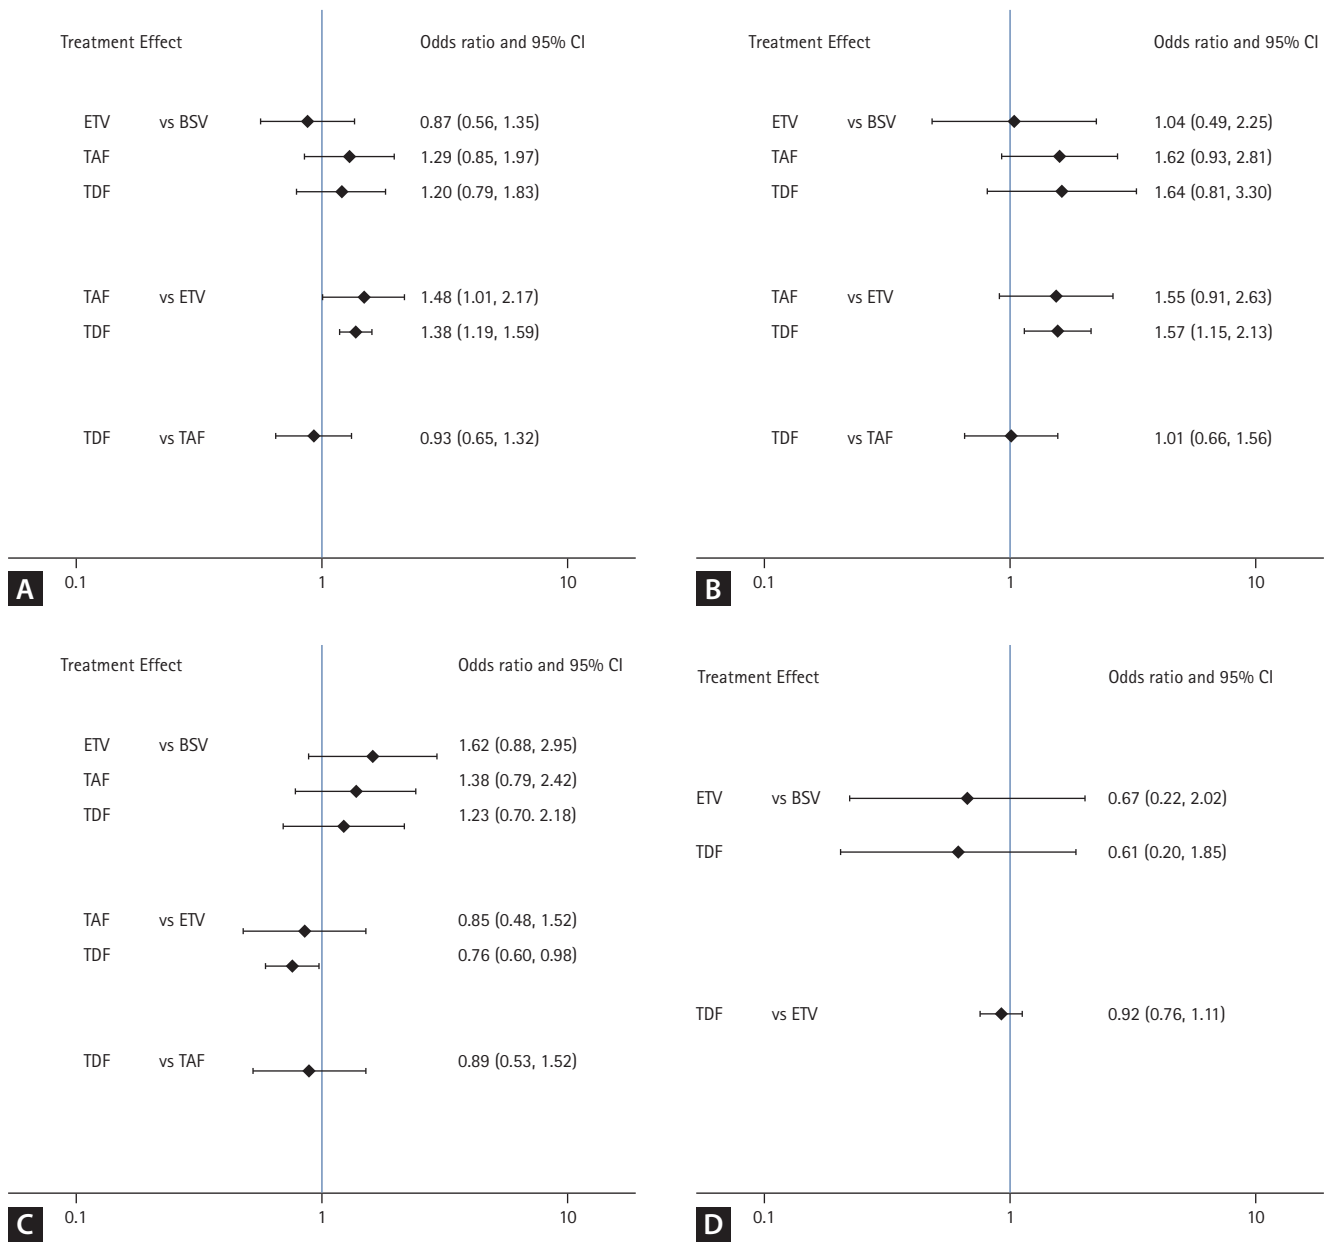

**Supplementary Figure 3.** Interval plot showing study outcomes in comparison with four nucleos(t)ide analogues using network meta-analysis. (A) 48-week virologic response. (B) 96-week virologic response. (C) 48-week biochemical response. (D) 48-week serologic response. ETV, entecavir; BSV, besifovir dipivoxil maleate; TAF, tenofovir alafenamide; TDF, tenofovir disoproxil fumarate; CI, confidence interval.
